# Supplementary material
Source: PubMed Central journal article supplement (PMC11216543)
Supplement: NIHMS1997371-supplement-Supplement_2.pdf [file NIHMS1997371-supplement-Supplement_2.pdf]

# Work Flow

---

Record ID

\_\_\_\_\_

---

Time start

\_\_\_\_\_

---

Task

- EHR
- Personal time
- Direct Patient Care
- Indirect Patient Care
- Communication
- Other

---

If other, please specify:

\_\_\_\_\_

---

Documenting

- Reviewed orders
- Medication reconciliation
- Paging
- Reviewed patient history
- Documented in chart
- Reviewed labs
- Personal time
- Direct patient care
- Indirect patient care
- Communication
- Other

---

Time stop

\_\_\_\_\_

---

Time elapsed (seconds)

\_\_\_\_\_

---

Time elapsed (minutes)

\_\_\_\_\_
